# Supplementary material
Source: publisher site journal article supplement (http://kjim.org/upload/media/kjim-2020-629-suppl2.pdf)
Supplement: Supplementary file 1 [file kjim-2020-629-suppl2.pdf]

**Supplementary Table 2. Central fatness at baseline and risk of diabetes**

| Variable                            | OR (95% CI)      |                      |                      |
|-------------------------------------|------------------|----------------------|----------------------|
|                                     | Unadjusted       | Model 1 <sup>a</sup> | Model 2 <sup>b</sup> |
| Per 1 SD higher of WC at baseline   | 1.48 (1.27–1.73) | 1.43 (1.09–1.89)     | 1.44 (1.07–1.92)     |
| Per 1 SD higher of WHtR at baseline | 1.45 (1.25–1.69) | 1.46 (1.09–1.95)     | 1.40 (1.02–1.90)     |
| Per 1 SD higher of BRI at baseline  | 1.43 (1.24–1.66) | 1.43 (1.07–1.89)     | 1.37 (1.02–1.85)     |

OR, odds ratio; CI, confidence interval; SD, standard deviation; WC, waist circumference; WHtR, waist-height ratio; BRI, body roundness index.

<sup>a</sup>Adjusted for age, sex, and body mass index.

<sup>b</sup>Adjusted for age, sex, body mass index, history of smoking and drinking, disease status (hypertension, dyslipidemia and cardiovascular disease), systolic blood pressure, hemoglobin A1c, total cholesterol/high-density lipoprotein cholesterol, uric acid, and walking speed at baseline.
